# Supplementary material for: Decelerated Epigenetic Aging in Long Livers
Source: MDPI journal article supplement (doi:10.3390/ijms242316867), 2023-11-28
Supplement: s1 [file s1]

**Supplementary Table S2.** List of PCR primers, pyrosequencing primers and sequences for analysis

| Gene           | Primer description                   | Primer sequence                                                                               | Ta   | Sequence to analyze                                                                        |
|----------------|--------------------------------------|-----------------------------------------------------------------------------------------------|------|--------------------------------------------------------------------------------------------|
| <i>ASPA</i>    | Forward<br>Reverse<br>Pyrosequencing | Biotin-ATTATTTGGTGAAATGATT<br>CAACCCTATTCTCTAAATCTC<br>CCCTATTCTCTAAATCTCA                    | 52°C | ACR1CCATTCTCTAACCAAT<br>ACTTAACCAAAAATACTCCR<br>2ATTAAC                                    |
| <i>EDARADD</i> | Forward<br>Reverse<br>Pyrosequencing | TTGGTGATTAGGAGTTTTAGTGTTTT<br>Biotin-CCACCTACAAATCCCCAAA<br>GGAGTTTGTATGGAAGAAGTAATA<br>GATTG | 56°C | YG1AGAAGATGTTYG2TTGG                                                                       |
| <i>ELOVL2</i>  | Forward<br>Reverse<br>Pyrosequencing | Biotin-AGGGGAGTAGGGTAAGTGAGG<br>AACAAAACCATTTCCCCCTAATAT<br>ACAACCAATAAATATTCCTAAAACT         | 60°C | CCR1TGAAACR2TTGAAGAC<br>CR3CCR4CR5CR6AAACCR7A<br>C                                         |
| <i>PDE4C</i>   | Forward<br>Reverse<br>Pyrosequencing | AGGTTTGTAGTAGGTTGAG<br>Biotin-AACTCAAATCCCTCTC<br>GTTATAGTATGATTAGAGTTT                       | 53°C | YG1AAGTATTTGTGGYG2GT<br>AATTTYG3GYG4TTTTATT<br>YG5ATTTAATAGYG6TTTTT<br>ATTYG7GATTYG8GATAAG |
