# Supplementary material for: Decelerated Epigenetic Aging in Long Livers
Source: MDPI journal article supplement (doi:10.3390/ijms242316867), 2023-11-28
Supplement: s1 [file s1]

**Supplementary Table S3.** Genomic coordinates of CpG sites of genes included in the study

| <b>Gene</b>                                       | <b>№ CpG</b> | <b>Chromosome location<br/>(GRCh38)</b> |
|---------------------------------------------------|--------------|-----------------------------------------|
| <i>Aspartoacylase (ASPA)</i>                      | 1            | Chr17: 3,476,273                        |
|                                                   | 2            | Chr17: 3,476,237                        |
| <i>EDAR associated death<br/>domain (EDARADD)</i> | 1            | Chr1: 236,394,382                       |
|                                                   | 2            | Chr1: 236,394,370                       |
| <i>ELOVL fatty acid elongase 2<br/>(ELOVL2)</i>   | 1            | Chr6: 11,044,661                        |
|                                                   | 2            | Chr6: 11,044,655                        |
|                                                   | 3            | Chr6: 11,044,647                        |
|                                                   | 4            | Chr6: 11,044,644                        |
|                                                   | 5            | Chr6: 11,044,642                        |
|                                                   | 6            | Chr6: 11,044,640                        |
|                                                   | 7            | Chr6: 11,044,634                        |
| <i>Phosphodiesterase 4C<br/>(PDE4C)</i>           | 1            | Ch19: 18,233,106                        |
|                                                   | 2            | Ch19: 18,233,092                        |
|                                                   | 3            | Ch19: 18,233,083                        |
|                                                   | 4            | Ch19: 18,233,080                        |
|                                                   | 5            | Ch19: 18,233,071                        |
|                                                   | 6            | Ch19: 18,233,059                        |
|                                                   | 7            | Ch19: 18,233,049                        |
|                                                   | 8            | Ch19: 18,233,043                        |
